1 **Phylogenetic diversity and activity screening of cultivable actinobacteria isolated**  
2 **from marine sponges and associated environments from the western coast of India**

3

4 Ulfat Baig<sup>1</sup>, Neelesh Dahanukar<sup>1</sup>, Neha Shintre<sup>2</sup>, Ketki Holkar<sup>1</sup>, Anagha Pund<sup>1</sup>, Uttara Lele<sup>1</sup>,  
5 Tejal Gujarathi<sup>1</sup>, Kajal Patel<sup>1</sup>, Avantika Jakati<sup>1</sup>, Ruby Singh<sup>1</sup>, Harshada Vidwans<sup>1</sup>, Vijayanti  
6 Tamhane<sup>3</sup>, Neelima Deshpande<sup>2</sup> and Milind Watve<sup>4</sup>

7

8 <sup>1</sup>Indian Institute of Science Education and Research, Pune (IISER-P), Dr. Homi Bhabha Road,  
9 Pashan, Pune 411008, Maharashtra, India.

10 <sup>2</sup>Department of Microbiology, M.E.S. Abasaheb Garware College, Karve Road, Pune 411004,  
11 Maharashtra, India.

12 <sup>3</sup>Institute of Bioinformatics and Biotechnology, Savitribai Phule Pune University, Pune –  
13 411007, Maharashtra, India

14 <sup>4</sup>Behavioural Intervention for Lifestyle Disorders (BILD) clinic, Deenanath Mangeshkar  
15 Hospital and Research Centre, Erandwane, Pune 411004, Maharashtra, India.

16

17 Correspondence and requests for materials should be addressed to N. Dahanukar (email:  
18 [n.dahanukar@iiserpune.ac.in](mailto:n.dahanukar@iiserpune.ac.in))

19

20

21

22 *Keywords:* Bacterial predation; Antibiotic production; Secondary metabolites; Enzyme  
23 inhibition; Molecular phylogeny.

24

25 **Abstract**

26 Phylogenetic diversity of cultivable actinobacteria isolated from sponges and associated  
27 environments of intertidal zones, along the northern parts of west coast of India, were studied  
28 using 16S rRNA gene sequences. A subset of actinobacteria were screened for three activities,  
29 namely predatory behavior, antibacterial activity and enzyme inhibition. We recovered 207  
30 isolates of actinobacteria belonging to 16 families and 25 genera, which could be attributed to  
31 55 putative species using Poisson Tree Processes and 60 putative species based on Bayesian  
32 Poisson Tree Processes. Although the trends in the discovery of actinobacterial genera isolated  
33 from sponges was consistent with previous studies from different study areas, we provide first  
34 report of six actinobacterial species from sponges. We observed widespread non-obligate  
35 epibiotic predatory behavior in eight actinobacterial genera and we provide first report of  
36 predatory activity in *Brevibacterium*, *Glutamicibacter*, *Micromonospora*, *Nocardiopsis*,  
37 *Rhodococcus* and *Rothia*. Sponge associated actinobacteria showed significantly more  
38 predatory behavior than environmental isolates. While antibacterial activity by actinobacterial  
39 isolates mainly affected Gram-positive target bacteria with little to no effect on Gram-negative  
40 bacteria, predation targeted both Gram-positive and Gram-negative prey with equal propensity.  
41 Actinobacterial isolates from both sponge and associated environment produced inhibitors of  
42 serine proteases and angiotensin converting enzyme. Predatory behavior was strongly  
43 associated with inhibition of trypsin and chymotrypsin. Our study suggests that sponge and  
44 associated environment of western coast of India are rich in actinobacterial diversity with  
45 widespread predatory activity, antibacterial activity and production of enzyme inhibitors.  
46 Understanding diversity and associations among various actinobacterial activities, with each  
47 other and the source of isolation, can provide new insights in marine microbial ecology and  
48 provide opportunities to isolate novel therapeutic agents.

## 49 INTRODUCTION

50 The marine ecosystem is not only diverse with respect to microorganisms found in it but also  
51 the natural products being synthesized by these microorganisms (Ward and Bora, 2006; Taylor  
52 et al., 2007; Lam, 2006). Actinobacteria are among the taxa rich in secondary metabolites  
53 (Barka et al., 2016) and are widely distributed in diverse habitats including soil, marine and  
54 freshwaters and sediments (Ward and Bora, 2006; Taylor et al., 2007; Tan et al., 2015; Brasel  
55 et al., 2019; Mincer et al., 2002; Kokare et al., 2004). They are also not uncommon in extreme  
56 environments (Jose and Jebakumar, 2014; Pathom-Aree et al., 2006; Mohammadipanah and  
57 Wink, 2016; Shivilata and Tulasi, 2015; Riquelme et al., 2015; Yang et al., 2015) and are also  
58 found as endobiotic symbionts of higher organisms (Taylor et al., 2007; Li et al., 2015;  
59 Mahmoud and Kalendar, 2016; Trujillo et al., 2015). They belong to the phylum Actinobacteria  
60 and represent one of the major phyla within the bacterial domain (Goodfellow, 2015). They are  
61 aerobic, spore forming, Gram-positive bacteria, which often produce diffusible pigments, and  
62 occur as cocci or rods, branched filaments, aerial or substrate mycelium (Goodfellow, 2015).  
63 The marine ecosystems are believed to have a wide range of unexplored diversity of  
64 actinobacteria (Montalvo et al., 2005) and their metabolites (Taylor et al., 2007; Lam, 2006;  
65 Manivasagan et al., 2005) with diverse biological activities like anticancer (Olano et al., 2009),  
66 anti-inflammatory (Trischman et al., 1994), antibiotic (Pimentel-Elardo et al., 2010; Cheng et  
67 al., 2015; Gandhimathi et al., 2008), cytotoxic (Abdelfattah et al., 2016) and enzyme inhibitory  
68 (Manivasagan et al., 2015; Imada, 2005) activity. Watve et al. (2001) estimated that the genus  
69 *Streptomyces* alone is capable of producing up to  $10^5$  different metabolites, majority of which  
70 remain unexplored. Of 23,000 medicinally important metabolites produced by marine  
71 microorganisms 70% are contributed by actinobacteria (Mahapatra et al., in press). Till date,  
72 eight genera of actinobacteria have been reported to produce secondary metabolites and 267  
73 products have been reported from 96 marine actinobacteria (Subramani and Sipkema, 2019)<sup>31</sup>.

74 Ecologically it is difficult to understand the production of extracellular metabolites or  
75 enzymes by aquatic bacteria, since any molecule secreted outside the cell can be quickly  
76 washed off. Extracellular products could be useful to the producer only in viscous or partially  
77 enclosed environments. In the marine environment, sponges are likely to provide such closed  
78 environment for bacteria. Sponges are filter feeders and collect small nutrient particles  
79 including bacteria. This makes the environment locally nutrient rich in an otherwise  
80 oligotrophic surroundings. Bacteria, especially actinobacteria, isolated from these sponges may  
81 live in a symbiotic relationship that helps the host in defense against predation, sponge skeleton  
82 stabilization, translocation of metabolites and help in nutritional process (Taylor et al., 2007;  
83 Li et al., 2015; Montalvo et al., 2005; Pimentel-Elardo et al., 2010; Cheng et al., 2015;  
84 Gandhimathi et al., 2008; Lee et al., 2009; Thomas et al., 2010). In addition, since sponges are  
85 sessile and lack other anti-predator defenses, secondary metabolites of bacteria can provide  
86 them with chemical defense (Lee et al., 2001). Therefore, we expect more secondary metabolite  
87 related activities from sponge-associated actinobacteria.

88 Sponge-associated actinobacteria are likely to have another ecological role. Among  
89 actinobacteria at least three genera, namely *Agromyces*, *Streptomyces* and *Streptoverticillium*,  
90 are shown to be predators that kill and feed on other live bacterial cells (Casida, 1980; 1983;  
91 Kumbhar et al., 2014). Kumbhar and Watve (2013) argued that antibiotic activity might have  
92 evolved primarily as a weapon in predation. However, the expression of secondary metabolites  
93 during predation may be independent of antibiotic expression in pure culture; the latter is likely  
94 to have evolved for mutualism with higher animal or plant hosts (Harir et al., 2018; Van der  
95 Meij et al., 2017). Further, for a niche of predation in association with sponge, the predatory  
96 species needs to protect itself from the digestive enzymes of the sponge as well as its own  
97 enzymes used for predation. Therefore, predatory actinobacteria are also expected to have  
98 efficient inhibitors of lytic enzymes.

99           In this study, we prepared an inventory of cultivable actinobacteria from sponges and  
100 associated environments of intertidal zones along the northern parts of west coast of India and  
101 studied their molecular diversity based on 16S rRNA gene sequences. We screened a subset of  
102 randomly selected cultures for predatory activity, antibiotic production and enzyme inhibition  
103 and tested their associations with each other and with the isolation source to test the hypotheses  
104 mentioned earlier.

105

## 106 **MATERIALS AND METHODS**

### 107 **Sample collection**

108 Small tissue samples (less than one gram) of marine sponges were collected at the time of low  
109 tide along Maharashtra and Goa coast (18–15°N and 73–74°E) of India during April 2014 to  
110 October 2018 without damaging the sponge or its associated environment. Specimens were  
111 rinsed and flushed with sterile media to remove debris and loosely attached microbes. Each  
112 sponge sample was collected in labeled polystyrene tubes with lids containing sterile Poor  
113 Ravan Saline (Watve et al., 2000) and ZoBell Marine broth (ZoBell, 1941). Sediment, water  
114 and air samples were collected from the same environment as that of the sponge and were  
115 collectively considered as environmental samples. The samples were brought to laboratory  
116 maintaining cold chain and were immediately processed for microbial culturing.

117

### 118 **Isolation and maintenance of cultivable actinobacteria**

119 Each sample was subjected to pre-heat treatment at 60°C for 15 minutes to eliminate non-  
120 sporulating bacteria. Sponge tissue (0.1 cm<sup>3</sup>) was homogenized in sterile medium and vortexed  
121 for 5 minutes. Tubes were left undisturbed for two minutes. From the resulting supernatant  
122 serial 10 fold dilutions upto 10<sup>-5</sup> were made and 0.1 ml sample was spread into triplicates on  
123 petri plates containing sterile medium. We used two media the Zobell Marine Agar (ZMA) and

124 Poor Ravan Saline Agar (PRSA) with and without antibiotic chloramphenicol (25 µg/ml).  
125 Plates were incubated at 30°C for 7 days in the case of ZMA and 21 days for PRSA. Plates  
126 were observed regularly for the growth of actinobacteria. Bacterial colonies that showed  
127 resemblance to actinobacteria under light microscope were purified several times on the  
128 respective media. In all 207 actinobacterial isolates were selected and were re-streaked for  
129 making pure cultures. Colonies were labeled as per Maharashtra Gene Bank (MGB) project  
130 code and preserved on ZMA slants at 4°C for further use. Similarly, glycerol (18%) stocks  
131 were prepared and maintained at -20°C for long term storage. Actinobacterial cultures are  
132 deposited in the Microbial Culture Collection (MCC) of National Centre for Microbial  
133 Resource, National Center for Cell Sciences, Pune, India (accession numbers are provided in  
134 the Supplementary Table S1).

135

### 136 **Genetic identification, phylogeny and species delimitation**

137 Actinobacterial isolates were outsourced for near complete 16S rRNA gene sequencing. Gene  
138 sequences used for the study are deposited in the GenBank database under the accession  
139 numbers MN339687–MN339897. Sequences were checked in BLAST (Altschul et al., 1990)  
140 to find the closest sequences available in the GenBank database (<http://www.ncbi.nlm.nih.gov>).  
141 Four species of Firmicutes, namely *Bacillus paralicheniformis* (MCC 6306), *B. thuringiensis*  
142 (MCC 7835), *B. subtilis* (MCC 6386) and *B. halotolerans* (MCC 8381), were used as outgroups  
143 (GenBank accession numbers MN339894–MN339897 respectively).

144 Gene sequences were aligned using MUSCLE (Edgar, 2004) implemented in MEGA 7  
145 (Kumar et al., 2016). Final aligned matrix had 1595 sites. Best nucleotide substitution model  
146 was determined using ModelFinder (Kalyaanamoorthy et al., 2017) based on Bayesian  
147 information criterion (Schwarz, 1978; Nei and Kumar, 2000). Maximum likelihood analysis

148 was performed in IQ Tree (Nguyen et al., 2015) with ultrafast bootstrap support (Hoang et al.,  
149 2018) for 1000 iterations. Phylogenetic tree was edited in FigTree v1.4.2 (Rambaut, 2009).

150 To understand putative number of actinobacterial species we performed species  
151 delimitation based on Poisson Tree Processes (PTP) and Bayesian Poisson Tree Processes  
152 (bPTP) methods (Zhang et al., 2013). Maximum likelihood tree was used to delimit species by  
153 setting the parameter values as follows: MCMC generations = 100,000, Thinning = 100, Burn-  
154 in = 0.1 and seed = 123.

155 We have identified all isolates up to genus level, while operational taxonomic units, in  
156 terms of putative species, are provided based on PTP and bPTP methods (see Supplementary  
157 Table S1). Only in the text, some isolates are assigned to known species based on BLAST  
158 search and sequence identity more than 99%.

159

## 160 **Screening for activities**

161 Out of 207 actinobacterial isolates, 49 isolates were randomly selected for screening of three  
162 activities, namely predation, antibiotic production and production of enzyme inhibition.

163

## 164 **Target bacteria used for predation and antibiotic screening**

165 Test bacteria, used for checking actinobacterial predation and antibiotic production, were  
166 obtained from MCC and National Collection of Industrial Microorganisms (NCIM), National  
167 Chemistry Laboratory, Pune, India. Fourteen bacteria, namely *Acetobacter pasteurianus* (NCIM  
168 2317), *Alcaligenes fecalis* (NCIM 2262), *Bacillus subtilis* (NCIM 2063), *Enterobacter fecalis*,  
169 *Escherichia coli* (NCIM 2184), *Klebsiella pneumoniae* (NCIM 2957), *Micrococcus luteus*  
170 (NCIM 2673), *Mycobacterium smegmatis* (NCIM 5138), *Proteus vulgaris* (NCIM 2172),  
171 *Pseudomonas aeruginosa* (NCIM 5029), *Salinicoccus roseus* (MCC 7574), *Salmonella*

172 *enterica* (NCIM 2501), *Serratia marcescens* (NCIM 2919) and *Staphylococcus aureus* (NCIM  
173 2121), were used as target species for screening.

174

#### 175 **Screening for actinobacterial predatory growth**

176 Growth of predator with the zone of clearance on prey cells was considered as predation as  
177 defined earlier (Kumbhar et al., 2014). The method for the preparation of prey cells was  
178 modified from Kumbhar et al. (2014). Pure cultures of the prey species were inoculated on  
179 nutrient agar plates to check the purity and were later re-inoculated in nutrient broth. Inoculated  
180 flasks were incubated at 37°C for 24 h. Broth was centrifuged at 7000 rpm for 10 minutes to  
181 concentrate cells using Eppendorf centrifuge 5810R. Cells were washed thrice with sterile  
182 distilled water to remove traces of nutrient broth. Pellet was suspended in saline to obtain a  
183 thick suspension of optical density of 1.0 at 600 nm. Lawn of prey cells was spread on water  
184 agarose plate and plates were incubated at 37°C for 40 minutes. Actinobacterial culture was  
185 spot inoculated on pre incubated plates. These plates were incubated at room temperature for  
186 48–72 h at 30°C. Plates with plaque were examined visually and by using 4x and 45x  
187 magnification under light microscope. Prey and predator control plates were used for  
188 comparison. Each experiment consisted of triplicate sets of plates, as well as one predator  
189 control for testing growth of actinobacterial predator without prey. In addition, there was a prey  
190 control to demonstrate viable and independent growth of prey without predator. In either  
191 controls there was no zone of clearance indicating there was no predation in the presence of  
192 predator or prey alone.

193

#### 194 **Screening for antibacterial activity using conventional cross streak method**

195 Selected actinobacterial cultures were screened for antibacterial activity by cross streak method  
196 (Velho-Pereira and Kamat, 2011; Valli et al., 2012). Test organism was streaked as a straight



197 line along the diagonal of the petri dish with sterile ZMA medium. The isolated pure colony of  
198 actinobacteria was inoculated as a single streak perpendicular to the central streak. Streaking  
199 was done from the edge of the plate to the test organism growth line. Plates were incubated at  
200 37°C for 18 h. The microbial inhibition was observed by determining zone of clearance around  
201 the sensitive organisms. Control plates of the same medium with the streak of test bacteria and  
202 without the streak of actinobacteria growth was used to observe the normal growth of the test  
203 bacteria.

204

### 205 **Screening for enzyme inhibitors**

206 Actinobacterial cultures were screened for their ability to inhibit the activity of serine proteases  
207 and angiotensin converting enzyme (ACE). Three different serine proteases i.e., Subtilisin,  
208 Trypsin and  $\alpha$ -Chymotrypsin were used for screening of inhibitory activity. Protease inhibitor  
209 activity was studied using unprocessed X-ray films and spot-test method (Cheung, 1991) with  
210 modifications. As described by Tripathi et al. (Tripathi et al., 2011), dilutions of pure enzyme  
211 were first spotted on gelatine coated films. Lowest dilution showing complete clearance  
212 (indicating complete digestion of gelatine) was chosen for further studies. Pure enzyme (100  
213  $\mu\text{g/ml}$ ) was incubated with equal quantity of cell free supernatant of actinobacterial isolates for  
214 10 minutes and transferred to untreated X-ray-Fuji Medical X-ray, HRU grade-films. The  
215 mixtures were allowed to react for 15 minutes at room temperature and results were recorded  
216 after washing the x-ray films under running water. Unprocessed X-ray films contain a layer of  
217 gelatine on their surface, which acts as a substrate for various proteolytic enzymes. Degradation  
218 of gelatine gives a clear zone at the site of activity. Thus, upon action of the proteases, clear  
219 zones were seen on unprocessed x-ray films, at the site of inoculation, whereas, if the gelatine  
220 layer remains intact, no clearance is observed. No clearance on the films indicated presence of  
221 protease inhibitors.

222 ACE acts on a specific substrate N-Hyppuryl-His-Leu (HHL) to liberate hippuric acid  
223 and His-Leu. Liberated hippuric acid was detected spectrophotometrically. Upon reaction of  
224 the enzyme with ACE inhibitors, the enzyme becomes inactive and this is measured in terms  
225 of lower levels of hippuric acid released. Protocol suggested by Cushman and Cheung (1971)  
226 was used with certain modifications and hippuric acid liberated was checked using method  
227 suggested by Ng et al. (2008). Equal amount of ACE and cell free supernatants (10 µl each)  
228 were allowed to react at 37°C. After 10 minutes 20 µl of HHL was added to the reaction mixture  
229 and reaction was continued for 30 mins at 37°C. The reaction was stopped by addition of 40 µl  
230 of 1 N HCl. Blank was prepared by addition of HCl before addition of the substrate. Positive  
231 enzyme control was prepared by incubating enzyme with un-inoculated broth. Liberated  
232 hippuric acid was extracted in 90 µl ethyl acetate by vigorous shaking. Ethyl acetate layer was  
233 collected in a fresh vial and allowed to dry in water bath of 50°C. The liberated hippuric acid  
234 was diluted in 150 µl distilled water and absorbance was checked at 228 nm. Zero was adjusted  
235 using distilled water. Test vials with more than 15% inhibition of ACE were considered as  
236 positive for ACE inhibitor.

237

## 238 **RESULTS**

### 239 **Actinobacterial phylogenetic diversity in sponge and associated environment**

240 Actinobacteria from sponges and associated environments showed a rich phylogenetic  
241 diversity (Figure 1). We obtained 207 actinobacterial isolates, from sponge and associated  
242 environments, belonging to 16 families and 25 genera (Supplementary Table S1). Species  
243 delimitation based on Poisson Tree Processes (PTP) suggested that these isolates belong to 55  
244 putative species, while Bayesian Poisson Tree Processes (bPTP) suggested 60 putative species.  
245 The two species delimitation methods, PTP and bPTP, differed in the groups of species under  
246 genera *Brevibacterium*, *Kocuria*, *Microbacterium* and *Streptomyces* (Supplementary Table

247 S1). Air was generally devoid of actinobacteria and we recovered only three isolates from air,  
248 belonging to genera *Brachybacterium*, *Brevibacterium* and *Rhodococcus*, as compared to 36  
249 isolates from water, 90 isolates from sediment and 78 isolates from sponge.

250 From sponges, 15 genera under 11 families belonging to 30 putative species based on  
251 PTP and 33 putative species based on bPTP were recorded (Figure 1, Table 1). From the  
252 sponge-associated environment, 21 genera under 14 families were recorded belonging to 40  
253 putative species as per PTP and 42 putative species as per bPTP. A total of 11 genera under 8  
254 families and 15 putative species that were common to both sponge and associated environment.  
255 Four genera, namely *Gordonia*, *Mycolicibacterium*, *Pseudonocardia* and *Rothia* were isolated  
256 only from sponges (Table 1), which could be identified to species *Gordonia terrae* (MCC  
257 6452), *Mycolicibacterium poriferae* (MCC 6242), *Pseudonocardia kongjuensis* (MCC 7930)  
258 and *Rothia terrae* (MCC 7823) respectively. Although 11 genera, namely *Agrococcus*,  
259 *Arthrobacter*, *Brachybacterium*, *Brevibacterium*, *Kocuria*, *Microbacterium*, *Micrococcus*,  
260 *Micromonospora*, *Nocardiopsis*, *Rhodococcus* and *Streptomyces*, were isolated from both  
261 sponges and associated habitats, most of these genera had some putative species that were  
262 either exclusive to sponges or associated environments. In particular, 7 species,  
263 *Brachybacterium muris* (MCC 7614), *Brevibacterium casei* (MCC 6140, MCC 6152, MCC  
264 6176), *Kocuria rhizophila* (MCC 8384), *Nocardiopsis salina* (MCC 7931), *Rhodococcus zopfii*  
265 (MCC 7934), *Streptomyces smyrnaeus* (MCC 7924) and *Streptomyces viridobrunneus* (MCC  
266 7990), were recorded only from sponges.

267 With respect to both, the number of isolates and number of putative species,  
268 *Streptomyces* was the most dominant genus, which was found in both sponges and associated  
269 environments. *Nocardiopsis* was the second most common genus with two dominant species  
270 *Nocardiopsis alba* (MCC 8385) followed by *N. dassonvillei* (MCC 7845). Other genera, which  
271 were present in both sponge and environment include *Agrococcus*, *Arthrobacter*,

272 *Brevibacterium*, *Kocuria*, *Microbacterium* and *Micrococcus*. Among the genera and species  
273 that were recorded only from the environment, we provide first record of species such as  
274 *Aeromicrobium massiliense* (MCC 6739) and *Glutamicibacter mysorens* (MCC 7825) from  
275 marine waters.

276

277 **Non-obligate epibiotic predatory activity.** Out of the total 49 actinobacterial isolates  
278 screened for non-obligate epibiotic predatory activity, 26 isolates showed predation on at least  
279 one of the 14 target organisms (Supplementary Table S2). Of the 26 isolates with predatory  
280 behavior, 17 preyed on Gram-negative prey, 21 preyed on Gram-positive prey, while 12 preyed  
281 on both Gram- negative and Gram-positive prey. There was no significant difference (Mann-  
282 Whitney U = 15, P = 0.2601) in the frequency of actinobacterial predators on Gram-negative  
283 and Gram-positive prey (Table 2). Most actinobacterial predators (n = 14) preyed on a single  
284 prey species while only a few predators preyed on multiple prey species with just a single  
285 predator of the genus *Streptomyces* that preyed on 8 prey species. There was a significant  
286 association between the source of isolation (sponge or associated environment) and predatory  
287 behavior ( $\chi^2 = 6.200$ , P = 0.0128), where the isolates from sponge showed proportionately  
288 more predatory behavior (Figure 2).

289 All eight isolates of *Streptomyces* used for screening showed predatory behavior and  
290 preyed on both Gram-negative and Gram-positive prey (Supplementary Table S2). Out of 25  
291 isolates of *Nocardiopsis*, 12 showed predatory behavior, out of which 5 preyed on Gram-  
292 negative bacteria while 11 preyed on Gram-positive bacteria. Both the isolates of  
293 *Micromonospora* preyed on Gram-positive prey while only one preyed on Gram-negative prey.  
294 Isolates belonging to genera *Brevibacterium*, *Glutamicibacter* and *Rhodococcus* preyed only  
295 on Gram-negative prey while *Rothia* preyed only on Gram-positive prey.

296

297 **Antibiosis, antibacterial activity and growth inhibition.** Of the 49 actinobacterial isolates  
298 screened for antibacterial activity, 25 showed antibiosis against at least one target organism  
299 (Supplementary Table S2). Of these 25 isolates, all showed antibiosis against at least one of  
300 the Gram-positive target species, while only five showed antibiosis against at least one of the  
301 Gram-negative organisms. The frequency of antibacterial activity against Gram-positive  
302 organisms was significantly higher (Mann-Whitney U = 1.5, P = 0.003) than those against  
303 Gram-negative organisms (Table 2). Most antibacterial activities were broad spectrum with  
304 respect to the target organisms that they affected. There were 10 actinobacterial isolates that  
305 showed antibiosis against two target organisms, 6 isolates that affected 4 target species and 2  
306 isolates that affected 6 target species. There was no association between antibacterial activity  
307 and the source (sponge or associated environment) of the isolation ( $\chi^2 = 2.543$ , P = 0.111).

308 Out of eight isolates of *Streptomyces* that were screened for antibacterial activity, five  
309 showed antibiosis, of which two showed antibiosis against Gram-negative target species, while  
310 all showed antibiosis against Gram-positive organisms. In the case of *Nocardiopsis*, of the 25  
311 isolates used for screening 17 showed antibiosis, of which all affected growth of Gram-positive  
312 organisms, while only two affected growth of Gram-negative organisms. Genus *Kytococcus*  
313 showed antibiosis that affected both Gram-positive as well as Gram-negative organisms, while  
314 *Glutamicibacter* and *Rothia* showed antibiosis against Gram-positive organisms only.

315

316 **Enzyme inhibition.** Out of 49 actinobacterial isolates screened for inhibition of four enzymes,  
317 30 isolates inhibited at least one of the enzyme (Supplementary Table S2). Of these 30 isolates,  
318 28 inhibited trypsin, 24 inhibited chymotrypsin, three inhibited angiotensin converting enzyme  
319 (ACE) and only two inhibited subtilisin. Venn diagram of frequency of isolates inhibiting  
320 different enzymes (Figure 3) suggested that five isolates inhibited only trypsin and one isolate  
321 each inhibited chymotrypsin and ACE, while subtilisin inhibition was accompanied by

322 inhibition of other enzymes. No isolate inhibited all four enzymes. Out of 30 actinobacteria  
323 that produced enzyme inhibitors, 19 produced two inhibitors, four produced three inhibitors  
324 while seven produced only one of the four inhibitors. There was no association between the  
325 enzyme inhibition and source of the actinobacterial isolate ( $\chi^2 = 2.2252$ ,  $P = 0.1358$ ).

326 Out of eight isolates of *Streptomyces* seven produced enzyme inhibitors against  
327 proteases, while 12 out of 25 isolates of *Nocardioopsis* produced enzyme inhibitors of which 11  
328 produced against proteases and two produced against ACE (Table 3). One isolate of  
329 *Actinomycetospora* inhibited activity of ACE.

330

331 **Associations between different activities.** Out of 49 actinobacterial isolates that were  
332 screened for activities, 39 showed at least one of the three activities. Of these 39 isolates, 15  
333 showed all three activities, while nine showed predation as well as enzyme inhibition (Figure  
334 4). There were only seven isolates that showed predation and antibiotic production against the  
335 same target organism (Table 2) and all these isolates belonged to genera *Streptomyces* and  
336 *Nocardioopsis*.

337 Antibiotic production showed no significant association with predation ( $\chi^2 = 2.4522$ ,  $P$   
338  $= 0.11736$ ) or any of the four enzyme inhibition ( $\chi^2 = 0.98702$ ,  $P = 0.32047$ ). However, there  
339 were significant associations between predation and protease inhibitors (Figure 5). There were  
340 24 isolates that showed both predation as well as inhibition of at least one enzyme and there  
341 was a significant association between the two activities ( $\chi^2 = 22.543$ ,  $P < 0.0001$ ), where  
342 predators proportionately produced more enzyme inhibitors than non-predators (Figure 5a).  
343 There were 23 actinobacterial isolates that showed predation as well as trypsin inhibition and  
344 there was a significant association between the two ( $\chi^2 = 22.185$ ,  $P < 0.0001$ ) with predators  
345 more likely to produce trypsin inhibitors than non-predators (Figure 5b). Similarly, 24  
346 actinobacteria were predators as well as inhibited chymotrypsin activity and there was a

347 significant association between the two ( $\chi^2 = 41.612$ ,  $P < 0.0001$ ) with predators more likely  
348 to produce chymotrypsin inhibitors than non-predators (Figure 5c).

349

## 350 **DISCUSSION**

351 Sponges and associated environment in northern parts of western coast of India are rich in  
352 actinobacterial diversity with about 60 putative species under 16 families and 25 genera. We  
353 recorded 11 species of actinobacteria only from sponges. Out of these, *Mycobacterium*  
354 *poriferae* was originally described from marine sponge (Padgitt and Moshier, 1987), while  
355 three species, *Gordonia terrae* (Elfalah et al., 2013; Santos et al., 2019; Montalvo et al., 2005),  
356 *Brevibacterium casei* (Kiran et al., 2010) and *Kocuria rhizophila* (Palomo et al., 2013), have  
357 been previously reported from sponges. To our knowledge, we provide first report of species,  
358 namely *Brachybacterium murisi*, *Nocardiosis salina*, *Pseudonocardia kongjuensis*,  
359 *Rhodococcus zopfii*, *Rothia terrae*, *Streptomyces smyrnaeus* and *Streptomyces viridobrunneus*,  
360 from marine sponges, although some of them are known from marine habitats (Stach et al.,  
361 2003; Satheeja and Jebakumar, 2011).

362 *Streptomyces* was the most dominant genus among the isolates, which agrees with the  
363 findings of Zhang et al. (2008). Genus *Nocardiosis*, with its two species *N. alba* and *N.*  
364 *dassonvillei*, has been suggested (Bennur et al., 2015) as the second common genus after  
365 *Streptomyces* and that too agrees with our findings. Further, report of most genera, including  
366 *Agrococcus*, *Arthrobacter*, *Brevibacterium*, *Kocuria*, *Microbacterium* and *Micrococcus*, from  
367 sponges in our study are consistent with previous reports from other study areas including  
368 South China Sea (Li et al., 2015), Yellow Sea (Zhang et al., 2008), Mediterranean Sea (Cheng  
369 et al., 2015), coast of Florida in USA (Montalvo, 2005) and northern coast of Brazil (Menezes  
370 et al., 2010) indicating that there are common trends in the discovery of actinobacteria from  
371 sponges.

372           Among the first reports from marine environment from our study, *Aeromicrobium*  
373 *massiliense* and *Glutamicibacter mysorens* are known from human fecal microbiota  
374 (Ramasamy et al., 2012) and sewage (Nand and Rao, 1972) respectively. Presence of these two  
375 species in the sediments along the collection site Harne (17.81°N, 73.09°E) likely suggests fecal  
376 pollution in this area.

377           Although predation is a widespread behavior in bacterial kingdom,  $\delta$ -proteobacteria of  
378 the orders *Myxococcales* and *Bdellovibrionales* have received more attention (Jurkevitch,  
379 2007) as compared to other taxa, especially the Gram-positive bacteria such as actinobacteria.  
380 Among actinobacteria only three genera, namely *Agromyces*, *Streptomyces* and  
381 *Streptoverticillium*, are known to have predatory behavior against other bacterial species  
382 (Casida, 1980; 1983; 1988; Kumbhar et al., 2014; Zeph and Casida, 1986). In the current study,  
383 for the first time, we show predation in six other genera of actinobacteria, namely  
384 *Brevibacterium*, *Glutamicibacter*, *Micromonospora*, *Nocardiopsis*, *Rhodococcus* and *Rothia*.  
385 Kumbhar et al. (2014) argued that predatory behavior is widespread in genus *Streptomyces* and  
386 even in the current study we observed that all the isolates of *Streptomyces* used for screening  
387 showed predation on Gram-positive as well as Gram-negative prey.

388           Since sponges are sessile and lack other anti-predator defenses, it has been suggested  
389 that secondary metabolites of bacteria can provide sponges with chemical defense (Lee et al.,  
390 2001; Kumbhar and Watve, 2013). However, we did not observe any significant association  
391 between the source of actinobacterial isolation and antibiotic production, suggesting that  
392 isolates even from environment were equally likely to produce antimicrobials as that of the  
393 isolates recovered from sponges. However, there was a significant association between the  
394 source of isolation and predatory activity, with proportionately more predators among the  
395 isolates recovered from sponge. Ecologically this makes sense. As the sponges are filter feeders  
396 and have regular intake of environmental bacteria, sponge associated actinobacteria will have



397 better predation opportunities. It is also possible that the predatory activity of sponge associated  
398 actinobacteria, could have evolved as a mutualistic activity as it can defend sponges from  
399 pathogenic bacterial invasions.

400         Actinobacteria are known to produce several enzyme inhibitors (Manivasagan et al.,  
401 2015; Imada, 2005). However, for the first time we show a strong association between  
402 predation and enzyme inhibition, specifically inhibition of trypsin and chymotrypsin, where  
403 predators produced proportionality more enzyme inhibitors as compared to non predators.  
404 Predators themselves are known to produce a variety of hydrolytic enzymes for degrading the  
405 prey (Pérez et al., 2016). Therefore, it is possible that the production of enzyme inhibitors  
406 safeguards their own cells from being target of the enzyme. It is also possible that enzyme  
407 inhibitors also protect the actinobacteria from hydrolytic enzymes produced from the sponge  
408 host and other microbiota.

409         An interesting observation that we made, when comparing the predation and antibiotic  
410 production by actinobacteria, was that, while predation was equally effective against Gram-  
411 positive as well as Gram-negative target species, antibiotic production was mainly effective  
412 against Gram-positive bacteria. It is therefore possible that studying the predatory behavior of  
413 actinobacteria and predation specific metabolites could lead to discovery of novel therapeutic  
414 agents that are more broad-spectrum.

415         Although actinobacteria are known to be rich in secondary metabolites, extracellular  
416 enzymes and enzyme inhibitors, the ecological role of these extracellular bioactive molecules  
417 is little known. We suggest that studying the ecological correlates of bioactivity and the inter-  
418 correlation patterns of different types of bioactivity can be a useful tool in understanding the  
419 ecological origins of bioactivity and testing alternative ecological hypotheses.

420

421

422 **CONCLUSION**

423 Sponges and associated environments of intertidal zones, along the northern parts of west coast  
424 of India, are rich in actinobacterial diversity with 16 families and 25 genera, which could be  
425 attributed to 55 putative species using PTP and 60 putative species based on bPTP methods.  
426 Although, at the genus level, the trends in the discovery of actinobacteria isolated from sponges  
427 was consistent with previous studies from different study areas, we provide first report of six  
428 species, namely *Brachybacterium murisi*, *Nocardiopsis salina*, *Pseudonocardia kongjuensis*,  
429 *Rhodococcus zopfii*, *Rothia terrae*, *Streptomyces smyrnaeus* and *Streptomyces*  
430 *viridobrunneus*. Non-obligate epibiotic predatory behavior was widespread among  
431 actinobacterial genera and we provide first report of predatory activity in *Brevibacterium*,  
432 *Glutamicibacter*, *Micromonospora*, *Nocardiopsis*, *Rhodococcus* and *Rothia*. Sponges  
433 associated actinobacteria showed significantly more predatory behavior than environmental  
434 isolates, and we hypothesize that predatory actinobacteria might provide sponges with defense  
435 against pathogenic bacteria. While antibiotic produced from actinobacterial isolates affected  
436 Gram-positive target bacteria with little to no effect on Gram-negative bacteria, predation  
437 targeted both Gram-positive and Gram-negative prey with equal propensity, suggesting that  
438 study of predation specific metabolites might provide novel therapeutic agents with broad-  
439 spectrum. Actinobacterial isolates from both sponge and associated environment produced  
440 inhibitors of serine proteases and angiotensin converting enzyme. Predatory behavior was  
441 strongly associated with inhibition of trypsin and chymotrypsin, which might be helpful for the  
442 actinobacteria for overcoming effects of proteolytic enzymes produced by sponge host and  
443 other microbiota. Understanding diversity and associations among various actinobacterial  
444 activities, with each other and the source of isolation, can provide new insights in marine  
445 microbial ecology and provide opportunities to isolate novel therapeutic agents.

446



448 **DATA AVAILABILITY**

449 Sequences of 16S rRNA gene of studied isolates are submitted to GenBank NCBI under the  
450 accession numbers MN339687–MN339897. All the data used for analysis is provided in  
451 supplementary information.

452

453 **ACKNOWLEDGEMENTS**

454 This work was funded by Maharashtra Gene Bank Programme (RGSTC/File-2007/DPP-  
455 054/CR-28) of Rajiv Gandhi Science and Technology Commission, Government of  
456 Maharashtra, India. We thank the Director and Chair of Biology, Indian Institute of Science  
457 Education and Research (IISER), Pune, and Principle, M.E.S. Abasaheb Garware College,  
458 Pune for providing infrastructural facilities. We are thankful to V. S. Rao, IISER Pune, for  
459 support an encouragement.

460

461 **AUTHOR CONTRIBUTIONS**

462 M.W., U.B. and N. Deshpande conceived and designed the study. U.B., N.S., K.H., A.P., U.L.,  
463 T.G., K.P., A.J., R.S., H.V and V.T. performed the study. N. Dahanukar and M.W. analyzed  
464 the data. N. Dahanukar, U.B. and M.W. wrote the manuscript with inputs from other authors.  
465 All authors contributed to the proofreading of the manuscript.

466

467 **Additional information**

468 Supplementary information: Supplementary Table S1 and Table S2 accompanies the online  
469 version of the paper.

470 Competing Interests: The authors declare no competing interests.

471

472 **References**

- 473 Abdelfattah, M. S., Elmallah, M. I. Y., Hawas, U. W., El-Kassema, L. T. A., and Eid, M. A.  
474 G. (2016). Isolation and characterization of marine-derived actinomycetes with cytotoxic  
475 activity from the Red Sea coast. *Asian Pacific J. Tropical Biomed.* 6, 651–657.
- 476 Altschul, S. F., Gish, W., Miller, W., Myers, E. W., and Lipman, D. J. (1990). Basic local  
477 alignment search tool. *J. Mol. Biol.* 215, 403–410.
- 478 Barka, E. A., Vatsa, P., Sanchez, L., Gaveau-Vaillant, N., Jacquard, C., Meier-Kolthoff, J. P.,  
479 Klenk, H. P., Clément, C., Ouhdouch, Y., and van Wezel, G. P. (2016). Taxonomy,  
480 physiology, and natural products of Actinobacteria. *Microbiol. Mol. Biol. Rev.* 80, 1–43.
- 481 Bennur, T., Kumar, A. R., Zinjarde, S., and Javdekar, V. (2015). *Nocardioopsis* species:  
482 Incidence, ecological roles and adaptations. *Microbiol. Res.* 174, 33–47.
- 483 Braesel, J., Lee, J. H., Arnould, B., Murphy, B. T., and Eustáquio, A. S. (2019).  
484 Diazaquinomycin biosynthetic gene clusters from marine and freshwater actinomycetes. *J.*  
485 *Nat. Prod.* 82, 937–946.
- 486 Casida, L. E. Jr. (1980). Bacterial predators of *Micrococcus luteus* in soil. *Appl. Environ.*  
487 *Microbiol.* 39, 1035–1041.
- 488 Casida, L. E. Jr. (1983). Interaction of *Agromyces ramosus* with other bacteria in soil. *Appl.*  
489 *Environ. Microbiol.* 46, 881–888.
- 490 Casida, L. E. (1988). Minireview: Nonobligate bacterial predation of bacteria in soil. *Microb.*  
491 *Ecol.* 15, 1–8.
- 492 Cheng, C., MacIntyre, L., Abdelmohsen, U. R., Horn, H., Polymenakou, P. N., Edrada-Ebel,  
493 R., and Hentschel, U. (2015). Biodiversity, anti-trypanosomal activity screening, and  
494 metabolomic profiling of actinomycetes isolated from Mediterranean sponges. *PLoS ONE*  
495 10, e0138528. doi: 10.1371/journal.pone.0138528.

- 496 Cheung, A. L., Ying, P., and Fischetti, V. A. (1991). A method to detect proteinase activity  
497 using unprocessed X-ray films. *Anal. Biochem.* 193, 20–23.
- 498 Cushman, D. W., and Cheung, H. S. (1971). Spectrophotometric assay and properties of the  
499 angiotensin-converting enzyme of rabbit lung. *Biochem. Pharmacol.* 20, 1637–1648.
- 500 Edgar, R. C. (2004). MUSCLE: multiple sequence alignment with high accuracy and high  
501 throughput. *Nucleic Acids Res.* 32, 1792–1797.
- 502 Elfalah, H. W., Usup, G., and Ahmad, A. (2013). Anti-microbial properties of secondary  
503 metabolites of marine *Gordonia tearrae* extract. *J. Agric. Sci.* 5, 94–101.
- 504 Gandhimathi, R. Arunkumar, M., Selvin, J., Thangavelu, T., Sivaramakrishnan, S., Kiran, G.  
505 S., Shanmughapriya, S., and Natarajaseenivasana, K. (2008). Antimicrobial potential of  
506 sponge associated marine actinomycetes. *J. Mycol. Med.* 18, 16–22.
- 507 Goodfellow, M. (2015) “Actinobacteria phyl. nov.”, in *Bergey’s Manual of Systematics of*  
508 *Archaea and Bacteria*, eds Whitman, W. B. et al., (New York: Wiley), 1–2. doi:  
509 10.1002/9781118960608.pbm00002.
- 510 Harir, M., Bendif, H., Bellahcene, M., Fortas, Z. & Pogni, R. (2018). “*Streptomyces* secondary  
511 metabolites”, in *Basic Biology and Applications of Actinobacteria*, ed. Enany, S. (London,  
512 IntechOpen), 99–122.
- 513 Hoang, D. T., Chernomor, O., von Haeseler, A., Minh, B. Q., and Vinh, L.S. (2018). UFBoot2:  
514 Improving the ultrafast bootstrap approximation. *Mol. Biol. Evol.* 35, 518–522.
- 515 Imada, C. (2005). Enzyme inhibitors and other bioactive compounds from marine  
516 actinomycetes. *Antonie Van Leeuwenhoek* 87, 59–63.
- 517 Jose, P. A., and Jebakumar, S. R. D. (2014). Unexplored hypersaline habitats are sources of  
518 novel actinomycetes. *Front. Microbiol.* 5, 242. doi: 10.3389/fmicb.2014.00242.
- 519 Jurkevitch, E. (2007). Predatory behaviors in bacteria-diversity and transitions. *Microbe* 2, 67–  
520 73.

- 521 Kalyaanamoorthy, S., Minh, B. Q., Wong, T. K. F., von Haeseler, A., and Jermini, L.S. (2017).  
522 ModelFinder: Fast model selection for accurate phylogenetic estimates. *Nat. Methods* 14,  
523 587–589.
- 524 Kiran, G. S., Sabarathnam, B., and Selvin, J. (2010). Biofilm disruption potential of a glycolipid  
525 biosurfactant from marine *Brevibacterium casei*. *FEMS Immunol. Med. Microbiol.* 59,  
526 432–438.
- 527 Kokare, C. R., Mahadik, K. R., and Kadam, S. S. (2004). Isolation of bioactive marine  
528 actinomycetes from sediments isolated from Goa and Maharashtra coastlines (west coast  
529 of India). *Indian J. Mar. Sci.* 33, 248–256.
- 530 Kumar, S., Stecher, G., and Tamura, K. (2016). MEGA7: molecular evolutionary genetics  
531 analysis version 7.0 for bigger datasets. *Mol. Biol. Evol.* 33, 1870–1874.
- 532 Kumbhar, C., and Watve, M. (2013). Why antibiotics: A comparative evaluation of different  
533 hypotheses for the natural role of antibiotics and an evolutionary synthesis. *Nat. Sci.* 5, 26–  
534 40.
- 535 Kumbhar, C., Mudliar, P., Bhatia, L., Kshirsagar, A., and Watve, M. (2014). Widespread  
536 predatory abilities in the genus *Streptomyces*. *Arch. Microbiol.* 196, 235–248.
- 537 Lam, K. S. (2006). Discovery of novel metabolites from marine actinomycetes. *Curr. Opin.*  
538 *Microbiol.* 9, 245–251.
- 539 Lee, O. O., Wong, Y. H., and Qian, P. Y. (2009). Inter- and intraspecific variations of bacterial  
540 communities associated with marine sponges from San Juan Island, Washington. *Appl.*  
541 *Environ. Microbiol.* 75, 3513–3521.
- 542 Lee, Y. K., Lee, J. H., and Lee, H. K. (2001). Microbial symbiosis in marine sponges. *J.*  
543 *Microbiol.* 39, 254–264.

- 544 Li, Z., Sun, W., Zhang, F., He, L., and Loganathan, K. (2015). Actinomycetes from the South  
545 China Sea sponges: isolation, diversity and potential for aromatic polyketides discovery.  
546 *Front. Microbiol.* 6, 1048. doi: 10.3389/fmicb.2015.01048.
- 547 Mahapatra, G. P., Raman, S., Nayak, S., Gouda, S., Das, G., and Patra, J. K. (in press).  
548 Metagenomics approaches in discovery and development of new bioactive compounds  
549 from marine actinomycetes. *Curr. Microbiol.* doi: 10.1007/s00284-019-01698-5.
- 550 Mahmoud, H. M., and Kalendar, A. A. (2016) Coral-associated Actinobacteria: diversity,  
551 abundance, and biotechnological potentials. *Front. Microbiol.* 7, 204. doi:  
552 10.3389/fmicb.2016.00204.
- 553 Manivasagan, P., Kang, K. H., Sivakumar, K., Li-Chan, E. C., Oh, H. M., and Kim, S. K.  
554 (2014). Marine actinobacteria: an important source of bioactive natural products. *Environ.*  
555 *Toxicol. Pharmacol.* 38, 172–188.
- 556 Manivasagan, P., Venkatesan, J., Sivakumar, K., and Kim, S. K. (2015). Actinobacterial  
557 enzyme inhibitors—A review. *Crit. Rev. Microbiol.* 41, 261–272.
- 558 Menezes, C. B., Bonugli-Santos, R. C., Miqueletto, P. B., Passarini, M. R., Silva, C. H., Justo,  
559 M. R., Leal, R. R., Fantinatti-Garboggini, F., Oliveira, V. M., Berlinck, R. G., and Sette, L.  
560 D. (2010). Microbial diversity associated with algae, ascidians and sponges from the north  
561 coast of São Paulo state, Brazil. *Microbiol. Res.* 165, 466–482.
- 562 Mincer, T. J., Jensen, P. R., Kauffman, C. A., and Fenical, W. (2002). Widespread and  
563 persistent populations of a major new marine actinomycete taxon in ocean sediments. *Appl.*  
564 *Environ. Microbiol.* 68, 5005–5011.
- 565 Mohammadipanah, F., and Wink, J. (2016). Actinobacteria from arid and desert habitats:  
566 diversity and biological activity. *Front. Microbiol.* 6, 1541. doi:  
567 10.3389/fmicb.2015.01541.



- 568 Montalvo, N. F., Mohamed, N. M., Enticknap, J. J., and Hill, R. T. (2005). Novel actinobacteria  
569 from marine sponges. *Antonie Van Leeuwenhoek* 87, 29–36.
- 570 Nand, K., and Rao, D. V. (1972). *Arthrobacter mysorens*—a new species excreting L-glutamic  
571 acid. *Zentralbl Bakteriol Parasitenkd Infektionskr Hyg.* 127, 324–331.
- 572 Nei, M., and Kumar, S. (2000). *Molecular evolution and phylogenetics*. UK, Oxford University  
573 Press.
- 574 Ng, K.H., Lye, H.S., Easa, A.M., and Liong, M.T. (2008). Growth characteristics and  
575 bioactivity of probiotics in tofu-based medium during storage. *Ann. Microbiol.* 58, 477–  
576 487.
- 577 Nguyen, L. T., Schmidt, H. A., von Haeseler, A., and Minh, B. Q. (2015). IQ-TREE: a fast and  
578 effective stochastic algorithm for estimating maximum likelihood phylogenies. *Mol. Biol.*  
579 *Evol.* 32, 268–274.
- 580 Olano, C., Méndez, C., and Salas, J. (2009). Antitumor compounds from marine actinomycetes.  
581 *Marine Drugs* 7, 210–248.
- 582 Padgitt, P. J., and Moshier, S. E. (1987). *Mycobacterium poriferae* sp. nov., a  
583 scotochromogenic, rapidly growing species isolated from a marine sponge. *Int. J. Syst.*  
584 *Evol. Microbiol.* 37, 186–191.
- 585 Palomo, S., González, I, de la Cruz, M., Martín, J., Tormo, J. R., Anderson, M., Hill, R. T.,  
586 Vicente, F., Reyes, F., and Genilloud, O. (2013). Sponge-derived *Kocuria* and  
587 *Micrococcus* spp. as sources of the new thiazolyl peptide antibiotic kocurin. *Marine Drugs*  
588 11, 1071–1086.
- 589 Pathom-Aree, W., Stach, J. E., Ward, A. C., Horikoshi, K., Bull, A. T., and Goodfellow, M.  
590 (2006). Diversity of actinomycetes isolated from Challenger Deep sediment (10,898 m)  
591 from the Mariana Trench. *Extremophiles* 10, 181–189.

- 592 Pérez, J., Moraleda-Muñoz, A., Marcos-Torres, F. J., and Muñoz-Dorado, J. (2016). Bacterial  
593 predation: 75 years and counting! *Environ. Microbiol.* 18, 766–779.
- 594 Pimentel-Elardo, S. M., Kozytska, S., Bugni, T. S., Ireland, C. M., Moll, H., and Hentschel, U.  
595 (2010). Anti-parasitic compounds from *Streptomyces* sp. strains isolated from  
596 Mediterranean sponges. *Marine Drugs* 8, 373–380.
- 597 Ramasamy, D., Kokcha, S., Lagier, J.-C., Nguyen, T.-T., Raoult, D., and Fournier, P.-E.  
598 (2012). Genome sequence and description of *Aeromicrobium massiliense* sp. nov. *Stand.*  
599 *Genomic Sci.* 7, 246–257.
- 600 Rambaut, A. (2009). FigTree. ver 1.4.3 <http://tree.bio.ed.ac.uk/software/figtree/>.
- 601 Riquelme, C., Hathaway, J. J. M., Enes Dapkevicius, M. de L. N., Miller, A. Z., Kooser, A.,  
602 Northup, D. E., Jurado, V., Fernandez, O., Saiz-Jimenez, C., and Cheeptham, N., (2015).  
603 Actinobacterial diversity in volcanic caves and associated geomicrobiological interactions.  
604 *Front. Microbiol.* 6, 1342. doi: 10.3389/fmicb.2015.01342.
- 605 Santos, J. D., Vitorino, I., De la Cruz, M., Díaz, C., Cautain, B., Annang, F., Pérez-Moreno, G.,  
606 Martínez, I. G., Tormo, J. R., Martín, J. M., Urbatzka, R., Vicente, F. M., and Lage, O. M.  
607 (2019). Bioactivities and extract dereplication of Actinomycetales isolated from marine  
608 sponges. *Front. Microbiol.* 10, 727. doi: 10.3389/fmicb.2019.00727.
- 609 Satheer, S. V., and Jebakumar, S. R. (2011). Phylogenetic analysis and antimicrobial activities  
610 of *Streptomyces* isolates from mangrove sediment. *J. Basic Microbiol.* 51, 71–79.
- 611 Schwarz, G. (1978). Estimating the dimension of a model. *Ann. Stat.* 6, 461–464.
- 612 Shivilata, L., and Tulasi, S. (2015). Thermophilic and alkaliphilic Actinobacteria: biology and  
613 potential applications. *Front. Microbiol.* 6, 1014. doi: 10.3389/fmicb.2015.01014.
- 614 Stach, J. E. M., Maldonado, L. A., Masson, D. G., Ward, A. C., Goodfellow, M., Bull, A. T.  
615 (2003). Statistical approaches for estimating actinobacterial diversity in marine sediments.  
616 *Appl. Environ. Microbiol.* 69, 6189–6200.

- 617 Subramani, R., and Sipkema, D. (2019). Marine rare actinomycetes: A promising source of  
618 structurally diverse and unique novel natural products. *Marine Drugs* 17, 249.
- 619 Tan, L. T. H., Ser, H. L., Yin, W. F., Chan, K. G., Lee, L. H., and Goh, B. H. (2015).  
620 Investigation of antioxidative and anticancer potentials of *Streptomyces* sp. MUM256  
621 isolated from Malaysia mangrove soil. *Front. Microbiol.* 6, 1316. doi:  
622 10.3389/fmicb.2015.01316.
- 623 Taylor, M. W., Radax, R., Steger, D., and Wagner, M. (2007). Sponge-associated  
624 microorganisms: evolution, ecology, and biotechnological potential. *Microbiol. Mol. Biol.*  
625 *Rev.* 71, 295–347.
- 626 Thomas, T. R., Kavlekar, D. P., and LokaBharathi, P. A. (2010). Marine drugs from sponge-  
627 microbe association - a review. *Marine Drugs* 8, 1417–1468.
- 628 Tripathi, V. R., Kumar, S., and Garg, S. K. (2011). A study on trypsin, *Aspergillus flavus* and  
629 *Bacillus* sp. protease inhibitory activity in *Cassia tora* (L.) syn *Senna tora* (L.) Roxb. seed  
630 extract. *BMC Complement. Altern. Med.* 11, 56. doi: 10.1186/1472-6882-11-56.
- 631 Trischman, J. A., Tapiolas, D. M., Jensen, P. R., Dwight, R., Fenical, W., McKee, T. C.,  
632 Ireland, C. M., Stout, T. J., and Clardy, J. (1994). Salinamides A and B: anti-inflammatory  
633 depsipeptides from a marine streptomycete. *J. American Chem. Soc.* 116, 757–758.
- 634 Trujillo, M. E., Riesco, R., Benito, P., and Carro, L. (2015). Endophytic actinobacteria and the  
635 interaction of *Micromonospora* and nitrogen fixing plants. *Front. Microbiol.* 6, 1341. doi:  
636 10.3389/fmicb.2015.01341.
- 637 Valli, S., Suvathi, S. S., Aysha, O. S., Nirmala, P., Vinoth, K. P., and Reena, A. (2012).  
638 Antimicrobial potential of Actinomycetes species isolated from marine environment. *Asian*  
639 *Pacific J. Tropical Biomed.* 2, 469–473.
- 640 Van der Meij, A., Worsley, S. F., Hutchings, M. I., and van Wezel, G. P. (2017). Chemical  
641 ecology of antibiotic production by actinomycetes. *FEMS Microbiol. Rev.* 41, 392–416.

- 642 Velho-Pereira, S., and Kamat, N.M. (2011). Antimicrobial screening of actinobacteria using a  
643 modified cross-streak method. *Indian J. Pharm. Sci.* 73, 223–228.
- 644 Ward, A. C., and Bora, N. (2006). Diversity and biogeography of marine actinobacteria. *Curr.*  
645 *Opin. Microbiol.* 9, 279–286.
- 646 Watve, M., Shejval, V., Sonawane, C., Rahalkar, M., Matapurkar, A., Shouche, Y., Patole, M.,  
647 Phadnis, N., Champhenkar, A., Damle, K., Karandikar, S., Kshirsagar, V., and Jog, M.  
648 (2000). The 'K' selected oligophilic bacteria: A key to uncultured diversity? *Curr. Sci.* 78,  
649 1535–1542.
- 650 Watve, M. G., Tickoo, R., Jog, M. M., and Bhole, B. D. (2001) How many antibiotics are  
651 produced by the genus *Streptomyces*? *Arch. Microbiol.* 176, 386–390.
- 652 Yang, J., Li, X., Huang, L., and Jiang, H. (2015). Actinobacterial diversity in the sediments of  
653 five cold springs on the qinghai-tibet plateau. *Front. Microbiol.* 6, 1345. doi:  
654 10.3389/fmicb.2015.01345.
- 655 Zeph, L. R., and Casida, L. E. (1986). Gram-negative versus gram-positive (actinomycete)  
656 nonobligate bacterial predators of bacteria in soil. *Appl. Environ. Microbiol.* 52, 819–823.
- 657 Zhang, H., Zhang, W., Jin, Y., Jin, M., and Yu, X. (2008). A comparative study on the  
658 phylogenetic diversity of culturable actinobacteria isolated from five marine sponge  
659 species. *Antonie van leeuwenhoek* 93, 241–248.
- 660 Zhang, J., Kapli, P., Pavlidis, P., and Stamatakis, A. (2013). A general species delimitation  
661 method with applications to phylogenetic placements. *Bioinformatics* 29, 2869–2876.
- 662 ZoBell, C. E. (1941). Studies on marine bacteria. I. The cultural requirements of heterotrophic  
663 aerobes. *J. Mar. Res.* 4, 41–75.
- 664

665 **Table 1.** Putative number of species of actinobacterial genera based on PTP and bPTP methods

666 isolated from sponge, associate environment and both sources.

667

| Family              | Genus                    | Sponge |      | Environment |      | Both |      |
|---------------------|--------------------------|--------|------|-------------|------|------|------|
|                     |                          | PTP    | bPTP | PTP         | bPTP | PTP  | bPTP |
| Actinomycetaceae    | <i>Streptomyces</i>      | 7      | 8    | 8           | 9    | 4    | 5    |
| Brevibacteriaceae   | <i>Brevibacterium</i>    | 5      | 6    | 2           | 2    | 1    | 1    |
| Cellulomonadaceae   | <i>Cellulomonas</i>      | 0      | 0    | 1           | 1    | 0    | 0    |
| Dermabacteraceae    | <i>Brachybacterium</i>   | 1      | 1    | 2           | 2    | 0    | 0    |
| Dietziaceae         | <i>Dietzia</i>           | 0      | 0    | 1           | 1    | 0    | 0    |
| Geodermatophilaceae | <i>Klenkia</i>           | 0      | 0    | 1           | 1    | 0    | 0    |
| Gordoniaceae        | <i>Gordonia</i>          | 1      | 1    | 0           | 0    | 0    | 0    |
| Intrasporangiaceae  | <i>Janibacter</i>        | 0      | 0    | 2           | 2    | 0    | 0    |
|                     | <i>Knoellia</i>          | 0      | 0    | 1           | 1    | 0    | 0    |
|                     | <i>Kytococcus</i>        | 0      | 0    | 1           | 1    | 0    | 0    |
| Microbacteriaceae   | <i>Agrococcus</i>        | 1      | 1    | 1           | 1    | 1    | 1    |
|                     | <i>Curtobacterium</i>    | 0      | 0    | 1           | 1    | 0    | 0    |
| Micrococcaceae      | <i>Microbacterium</i>    | 1      | 1    | 1           | 2    | 1    | 1    |
|                     | <i>Arthrobacter</i>      | 1      | 1    | 2           | 2    | 1    | 1    |
|                     | <i>Glutamicibacter</i>   | 0      | 0    | 1           | 1    | 0    | 0    |
|                     | <i>Kocuria</i>           | 3      | 4    | 4           | 4    | 2    | 1    |
|                     | <i>Micrococcus</i>       | 1      | 1    | 2           | 2    | 1    | 1    |
|                     | <i>Rothia</i>            | 1      | 1    | 0           | 0    | 0    | 0    |
| Micromonosporaceae  | <i>Micromonospora</i>    | 1      | 1    | 1           | 1    | 1    | 1    |
| Mycobacteriaceae    | <i>Mycolicibacterium</i> | 1      | 1    | 0           | 0    | 0    | 0    |
| Nocardiaceae        | <i>Rhodococcus</i>       | 2      | 2    | 2           | 2    | 1    | 1    |
| Nocardiodaceae      | <i>Aeromicrobium</i>     | 0      | 0    | 1           | 1    | 0    | 0    |
| Nocardiosaceae      | <i>Nocardiosis</i>       | 3      | 3    | 3           | 3    | 2    | 2    |
| Pseudonocardiaceae  | <i>Actinomycetospora</i> | 0      | 0    | 2           | 2    | 0    | 0    |
|                     | <i>Pseudonocardia</i>    | 1      | 1    | 0           | 0    | 0    | 0    |
| Total               |                          | 30     | 33   | 40          | 42   | 15   | 15   |

668

669

670

671 **Table 2.** Predation and antibiotic production by actinobacteria against the Gram positive and  
672 Gram negative target species.

673

| Target species                 | Predation | Antibiotic | Predation and Antibiotic<br>by same actinobacterial<br>isolate |
|--------------------------------|-----------|------------|----------------------------------------------------------------|
| Gram positive                  |           |            |                                                                |
| <i>Mycobacterium smegmatis</i> | 3         | 12         | 0                                                              |
| <i>Micrococcus luteus</i>      | 8         | 5          | 0                                                              |
| <i>Bacillus subtilis</i>       | 1         | 24         | 1                                                              |
| <i>Staphylococcus aureus</i>   | 17        | 9          | 4                                                              |
| <i>Salinicoccus roseus</i>     | 9         | 3          | 0                                                              |
| <i>Enterococcus faecalis</i>   | 3         | 20         | 1                                                              |
| Gram negative                  |           |            |                                                                |
| <i>Acetobacter pastorianus</i> | 7         | 0          | 0                                                              |
| <i>Alcaligenes faecalis</i>    | 3         | 1          | 1                                                              |
| <i>Escherichia coli</i>        | 2         | 5          | 0                                                              |
| <i>Klebsiella pneumoniae</i>   | 3         | 0          | 0                                                              |
| <i>Proteus vulgaris</i>        | 8         | 0          | 0                                                              |
| <i>Salmonella enterica</i>     | 2         | 0          | 0                                                              |
| <i>Serratia marcescens</i>     | 3         | 0          | 0                                                              |
| <i>Pseudomonas aeruginosa</i>  | 1         | 0          | 0                                                              |

674

675

676 **Table 3.** Frequency of actinobacterial isolates producing four different enzyme inhibitors.

677

| Genus                    | Number of isolates | Frequency of isolates inhibiting |         |              |     | Isolates with at least one inhibition activity |
|--------------------------|--------------------|----------------------------------|---------|--------------|-----|------------------------------------------------|
|                          |                    | Subtilisin                       | Trypsin | Chymotrypsin | ACE |                                                |
| <i>Actinomycetospora</i> | 2                  | 0                                | 1       | 0            | 1   | 2                                              |
| <i>Agrococcus</i>        | 1                  | 0                                | 0       | 0            | 0   | 0                                              |
| <i>Brevibacterium</i>    | 1                  | 0                                | 1       | 1            | 0   | 1                                              |
| <i>Glutamicibacter</i>   | 1                  | 0                                | 1       | 1            | 0   | 1                                              |
| <i>Kocuria</i>           | 1                  | 0                                | 0       | 0            | 0   | 0                                              |
| <i>Kytococcus</i>        | 1                  | 0                                | 1       | 0            | 0   | 1                                              |
| <i>Micrococcus</i>       | 1                  | 0                                | 1       | 0            | 0   | 1                                              |
| <i>Micromonospora</i>    | 2                  | 0                                | 2       | 2            | 0   | 2                                              |
| <i>Nocardiopsis</i>      | 25                 | 0                                | 11      | 11           | 2   | 12                                             |
| <i>Pseudonocardia</i>    | 1                  | 0                                | 0       | 0            | 0   | 0                                              |
| <i>Rhodococcus</i>       | 4                  | 0                                | 2       | 1            | 0   | 2                                              |
| <i>Rothia</i>            | 1                  | 0                                | 1       | 1            | 0   | 1                                              |
| <i>Streptomyces</i>      | 8                  | 2                                | 7       | 7            | 0   | 7                                              |

678

679



680 **Figure 1.** Maximum likelihood phylogenetic tree of actinobacterial isolates based on TIM3+R6  
681 nucleotide substitution model. Firmicutes belonging to genus *Bacillus* were used as outgroups.  
682 Sequence codes in red were used for screening.  
683

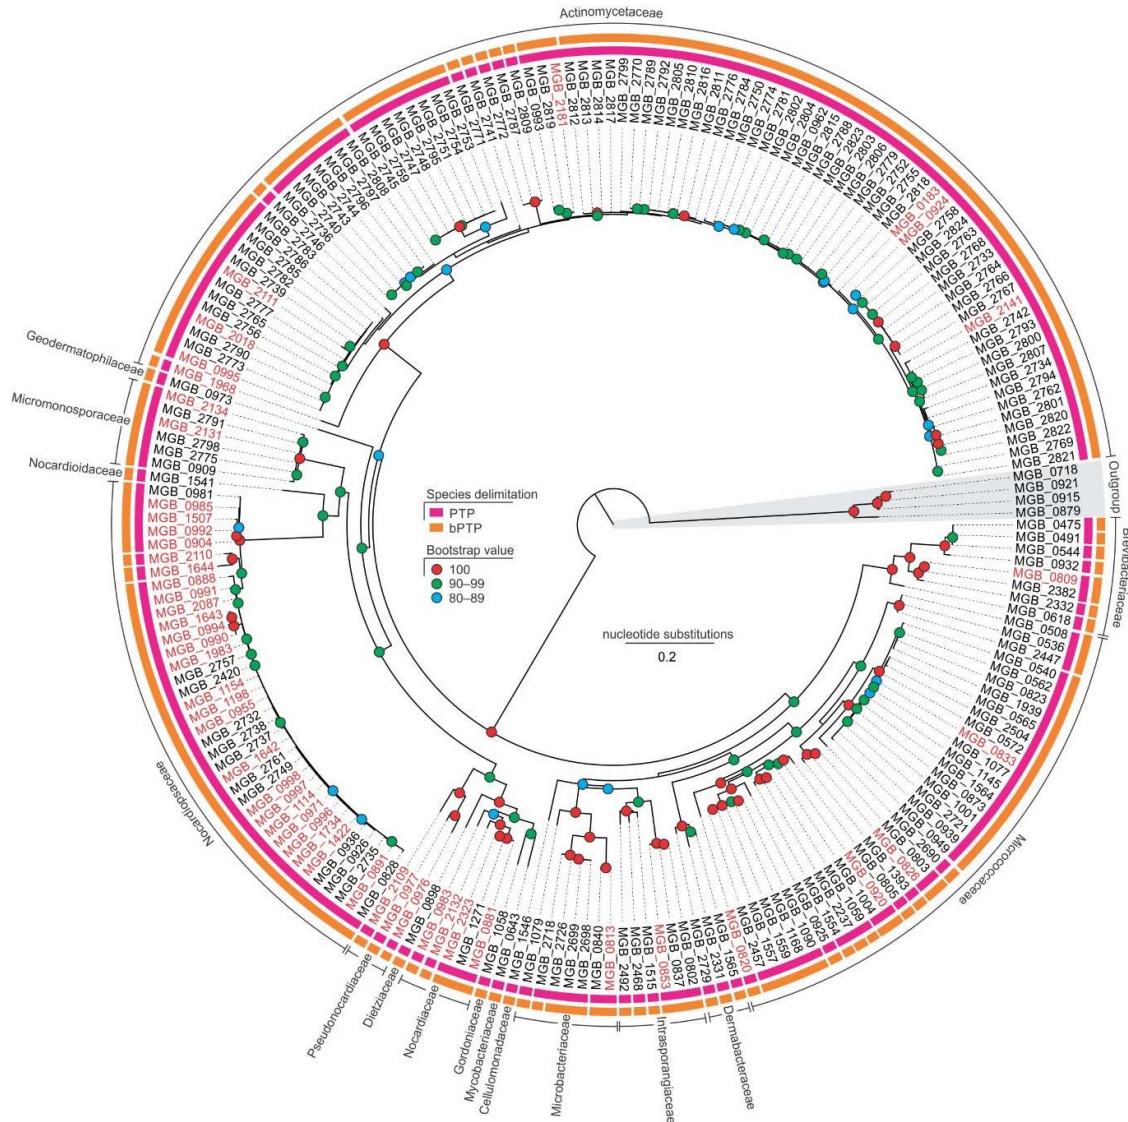

684

685



686 **Figure 2.** Association between source of actinobacterial isolation on their predatory behavior.

687 There was a significant association between the source (sponge or associated environment) of

688 actinobacterial isolation and predation ( $\chi^2 = 6.200$ ,  $P = 0.0128$ ).

689

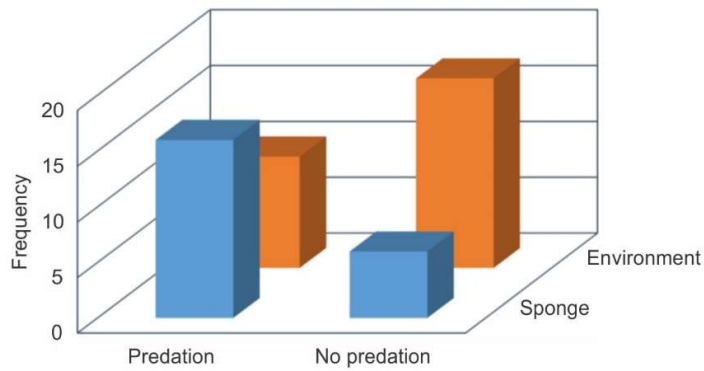

690

691

692

693 **Figure 3.** Venn diagrams combination of enzyme inhibitors produced by actinobacterial  
694 isolates. Venn diagrams is not to scale.

695

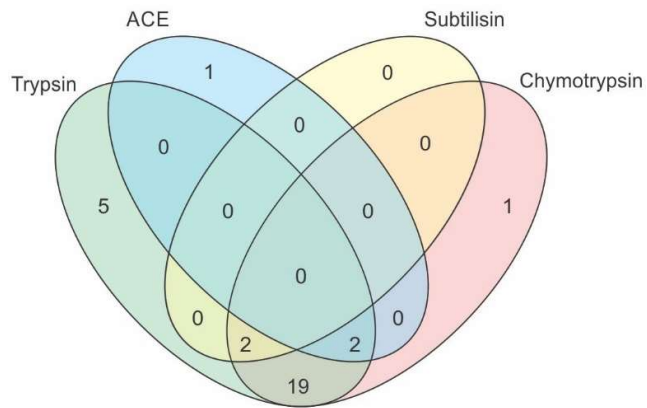

696

697

698

699 **Figure 4.** Venn diagrams of predation, antibiotic production and enzyme inhibition by  
700 actinobacterial isolates. Venn diagrams is not to scale.

701

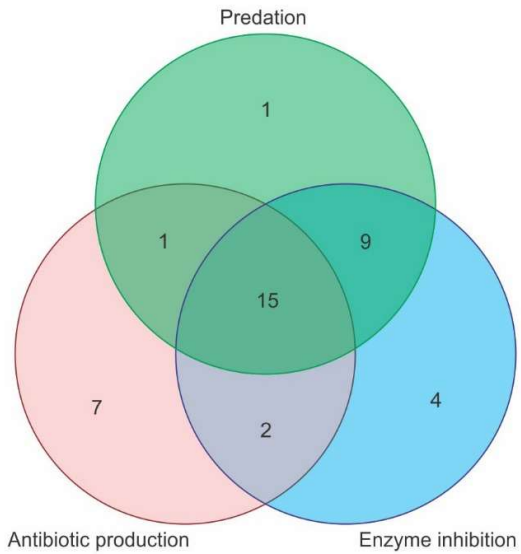

702

703

704 **Figure 5.** Association between enzyme inhibition and predation in actinobacterial isolates.

705 Predation was significantly associated with (a) inhibition of any one of the four enzymes tested

706 ( $\chi^2 = 22.543$ ,  $P < 0.0001$ ), (b) inhibition of trypsin ( $\chi^2 = 22.185$ ,  $P < 0.0001$ ) and (c) inhibition

707 of chymotrypsin ( $\chi^2 = 41.612$ ,  $P < 0.0001$ ).

708

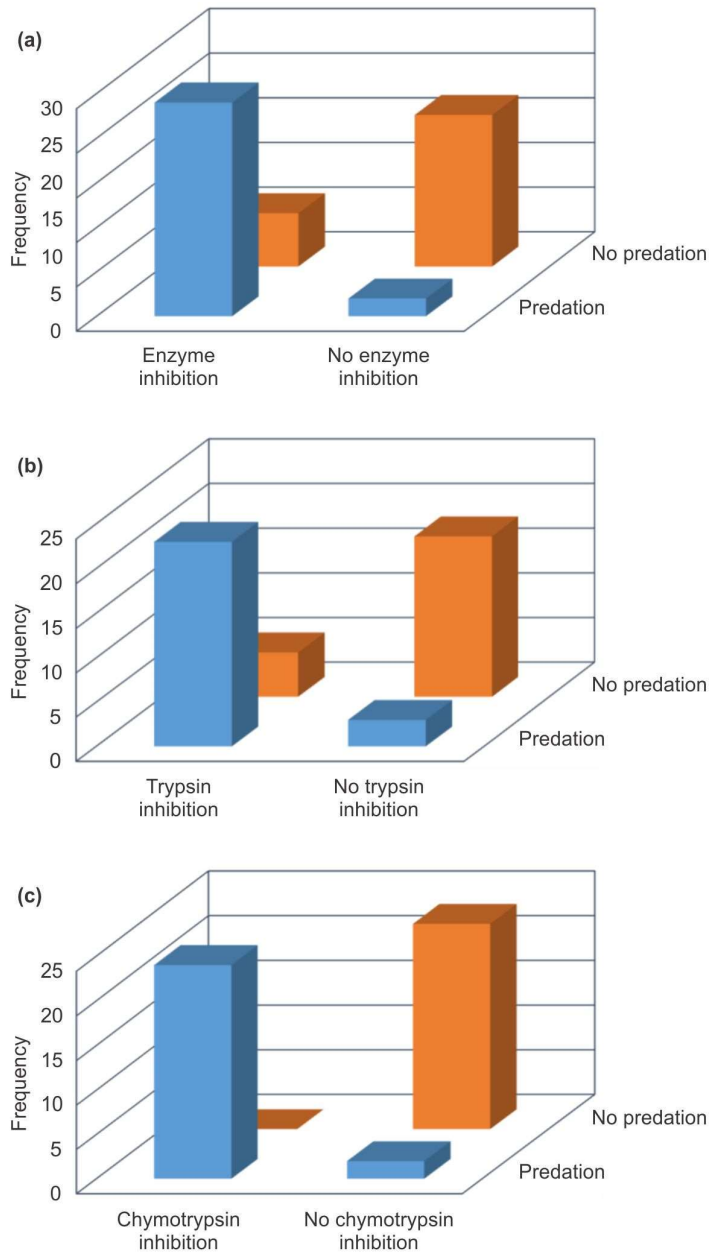

709

710
